# Supplementary material
Source: PubMed Central journal article supplement (PMC2527103)
Supplement: supp_M803244200_FigS1_Jonsson.pdf [file supp_M803244200_FigS1_Jonsson.pdf]

## Supplemental Figure 1

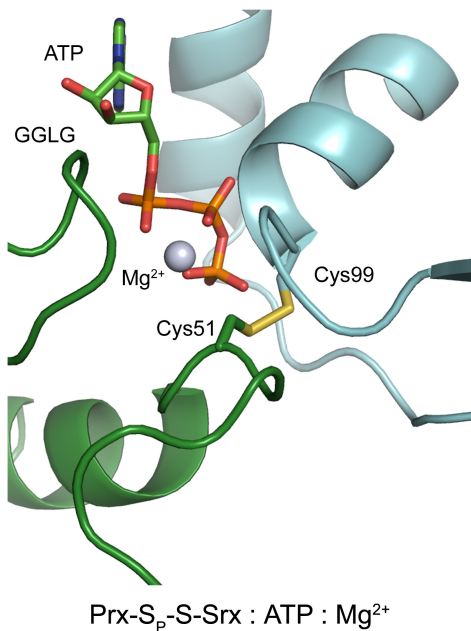

Figure S1. Crystal structure of Srx:ATP:Mg<sup>2+</sup> modeled onto the disulfide-bonded Srx-PrxI crystal structure (PDB # 2RII).
